# Supplementary material
Source: PubMed Central journal article supplement (PMC4567908)
Supplement: NIHMS697718-supplement-supplement_1.pdf [file NIHMS697718-supplement-supplement_1.pdf]

**Supplementary Table 1.** Distribution (n [%]) of Characteristics Among Barrett's Esophagus Cases and Controls with Information on Dietary Intake, Study of Reflux Disease, Western Washington State, 1997-2000.

| Characteristic             | Control subjects<br>N=183 | Barrett's Esophagus subjects<br>N=170 |
|----------------------------|---------------------------|---------------------------------------|
| <b>Age</b>                 |                           |                                       |
| 20-39                      | 25 (13.7)                 | 22 (12.9)                             |
| 40-49                      | 46 (25.1)                 | 42 (24.7)                             |
| 50-59                      | 55 (30.1)                 | 53 (31.2)                             |
| 60-80                      | 57 (31.1)                 | 53 (48.2)                             |
| <b>Sex</b>                 |                           |                                       |
| Male                       | 113 (61.7)                | 100 (58.8)                            |
| Female                     | 70 (38.3)                 | 70 (41.2)                             |
| <b>Race</b>                |                           |                                       |
| White                      | 169 (92.9)                | 152 (91.6)                            |
| Other                      | 13 (7.1)                  | 14 (8.4)                              |
| Missing                    | 1                         | 4                                     |
| <b>Education</b>           |                           |                                       |
| ≤ High School              | 32 (17.5)                 | 43 (25.3)                             |
| Technical School           | 6 (3.3)                   | 9 (5.3)                               |
| College or more            | 145 (79.2)                | 118 (69.4)                            |
| <b>Income level, US \$</b> |                           |                                       |
| <45,000                    | 55 (31.4)                 | 50 (32.5)                             |
| ≥45,000-74,999             | 51 (29.1)                 | 49 (31.8)                             |
| ≥75,000                    | 69 (39.4)                 | 55 (35.7)                             |
| Missing                    | 8                         | 16                                    |
| <b>Cigarette Use</b>       |                           |                                       |
| Ever                       | 89 (48.6)                 | 109 (64.1)                            |
| Never                      | 94 (51.4)                 | 61 (35.9)                             |
| <b>Body Mass Index</b>     |                           |                                       |
| <25 kg/m <sup>2</sup>      | 57 (31.1)                 | 33 (19.4)                             |
| ≥25 kg/m <sup>2</sup>      | 126 (68.9)                | 137 (80.6)                            |
| <b>Segment Length*</b>     |                           |                                       |
| SIM                        |                           | 170 (100.0)                           |
| VBE                        |                           | 86 (50.6)                             |
| LSBE                       |                           | 48 (28.2)                             |

\*Barrett's esophagus segment length categories are non-mutually exclusive groups. SIM: Specialized intestinal metaplasia (i.e., all cases), VBE: visible Barrett's esophagus (i.e., SIM with VBE), LSBE: long-segment Barrett's esophagus (i.e., SIM with VBE greater than two centimeters).

**Supplementary Figure 1.** Restricted quadratic spline graph of the adjusted odds ratios (represented by the solid line) and 95% confidence intervals (represented by the dotted lines) of the association between anthocyanidin intake and Barrett's esophagus, Study of Reflux Disease, Western Washington State, 1997-2000.

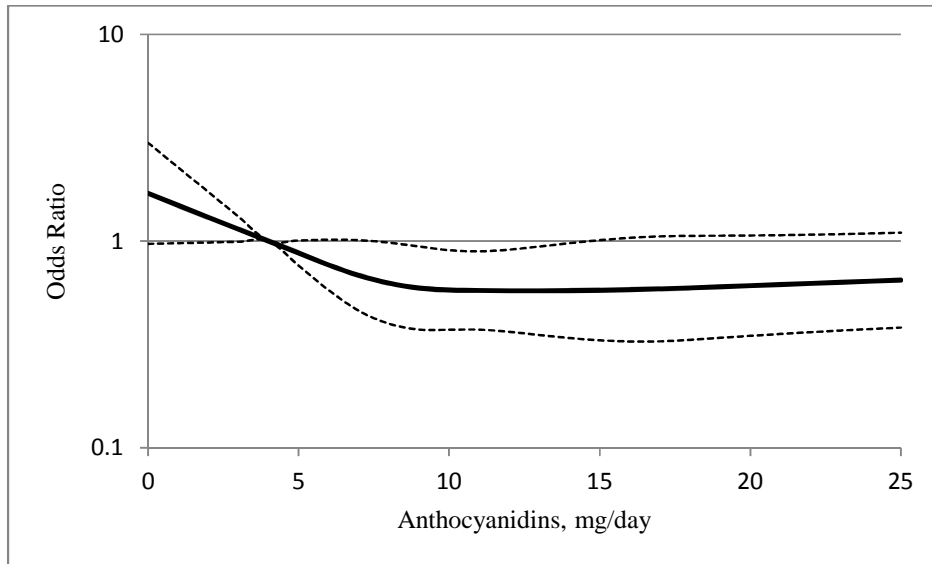

**Supplementary Table 2.** Sensitivity Analysis of Mean Intakes (mg/day) of Anthocyanidins (With and Without a Value for Bananas) Among Cases and Controls With Information on Dietary Intake, Study of Reflux Disease, Western Washington State, 1997-2000.

|                                                 | Controls<br>(N=183) |                       |            | Cases<br>(N=170) |                       |            |
|-------------------------------------------------|---------------------|-----------------------|------------|------------------|-----------------------|------------|
|                                                 | Mean                | Standard<br>Deviation | Range      | Mean             | Standard<br>Deviation | Range      |
| Anthocyanidins                                  | 13.84               | 11.31                 | 0.29-55.42 | 13.47            | 14.21                 | 0.36-85.19 |
| Anthocyanidins,<br>Without Value for<br>Bananas | 11.80               | 10.67                 | 0.18-52.97 | 11.78            | 13.15                 | 0.36-79.93 |

**Supplementary Table 3.** Sensitivity Analysis of the Major Sources of Anthocyanidins (With and Without a Value for Bananas) Among a Community-based Sample of Control Participants Without Barrett’s Esophagus With Information on Dietary Intake, Study of Reflux Disease, Western Washington State, 1997-2000.

| <b>Flavonoid/Phytoestrogen Class</b>      | <b>Main FFQ* Line Item Sources (%)</b>                                                                                                          |
|-------------------------------------------|-------------------------------------------------------------------------------------------------------------------------------------------------|
| Anthocyanidins                            | Wine (31.2), bananas (14.8), fruit juice (11.3), fruit cocktail/applesauce (8.5), strawberries/kiwi (8.0), apples/pears (7.6), bean soups (5.5) |
| Anthocyanidins, Without Value for Bananas | Wine (36.6), fruit juice (13.3), fruit cocktail/applesauce (10.0), strawberries/kiwi (9.3), apples/pears (9.0), bean soups (6.4)                |

\*FFQ: Food frequency questionnaire.

**Supplementary 4.** Sensitivity Analysis of Adjusted\* Odds Ratios (OR) and 95% Confidence Intervals (CI) for the Association Between Anthocyanidin Intakes (With and Without a Value for Bananas) and Barrett’s Esophagus, Study of Reflux Disease, Western Washington State, 1997-2000.

| Variable and intake (mg/day)                     | Controls (N=183) | Cases (N=170) | OR   | 95% CI     |
|--------------------------------------------------|------------------|---------------|------|------------|
| <b>Anthocyanidins</b>                            |                  |               |      |            |
| 0-6.12                                           | 46               | 64            | 1.00 |            |
| 6.13-9.82                                        | 45               | 24            | 0.33 | 0.17, 0.63 |
| 9.83-18.26                                       | 47               | 46            | 0.58 | 0.32, 1.06 |
| ≥18.27                                           | 45               | 36            | 0.59 | 0.31, 1.12 |
| P for trend†                                     |                  |               | 0.91 |            |
| <b>Anthocyanidins, Without Value for Bananas</b> |                  |               |      |            |
| 0-4.68                                           | 45               | 54            | 1.00 |            |
| 4.69-8.29                                        | 46               | 40            | 0.65 | 0.35, 1.19 |
| 8.30-15.26                                       | 47               | 42            | 0.62 | 0.33, 1.16 |
| ≥15.27                                           | 45               | 34            | 0.64 | 0.33, 1.22 |
| P for trend†                                     |                  |               | 0.90 |            |

\*Adjusted for age (continuous), sex, body mass index (continuous), and kilocalories (continuous). †P-value for trend for continuous variable.

**Supplementary Table 5.** Sensitivity Analysis of Adjusted\* Odds Ratios (OR) and 95% Confidence Intervals (CI) for the Association Between Anthocyanidin Intakes (With and Without a Value for Bananas) and Barrett’s Esophagus Segment Length,<sup>2</sup> Study of Reflux Disease, Western Washington State, 1997-2000.

| Variable and intake (mg/day)                     | Controls (N=183) | Clinical SIM† |      |            | Clinical VBE† |              |      | Clinical LSBE† |              |              |      |            |              |
|--------------------------------------------------|------------------|---------------|------|------------|---------------|--------------|------|----------------|--------------|--------------|------|------------|--------------|
|                                                  |                  | Cases (N=170) | OR   | 95% CI     | P for trend‡  | Cases (N=86) | OR   | 95% CI         | P for trend‡ | Cases (N=48) | OR   | 95% CI     | P for trend‡ |
| <b>Anthocyanidins</b>                            |                  |               |      |            |               |              |      |                |              |              |      |            |              |
| 0-6.12                                           | 46               | 64            | 1.00 |            |               | 31           | 1.00 |                |              | 20           | 1.00 |            |              |
| ≥6.13                                            | 137              | 106           | 0.49 | 0.30, 0.80 | 0.91          | 55           | 0.56 | 0.31, 1.02     | 0.45         | 28           | 0.44 | 0.21, 0.92 | 0.67         |
| <b>Anthocyanidins, Without Value for Bananas</b> |                  |               |      |            |               |              |      |                |              |              |      |            |              |
| 0-4.68                                           | 45               | 54            | 1.00 |            |               | 24           | 1.00 |                |              | 15           | 1.00 |            |              |
| ≥4.69                                            | 138              | 116           | 0.64 | 0.39, 1.05 | 0.90          | 62           | 0.81 | 0.43, 1.52     | 0.33         | 33           | 0.69 | 0.32, 1.50 | 0.43         |

\*Adjusted for age (continuous), sex, body mass index (continuous), and kilocalories (continuous). †Barrett’s esophagus segment length categories are non-mutually exclusive groups. SIM: Specialized intestinal metaplasia (i.e., all cases), VBE: visible Barrett’s esophagus (i.e., SIM with VBE), LSBE: long-segment Barrett’s esophagus (i.e., SIM with VBE greater than two centimeters). ‡P-value for trend for continuous variable.
